PCT\_10X

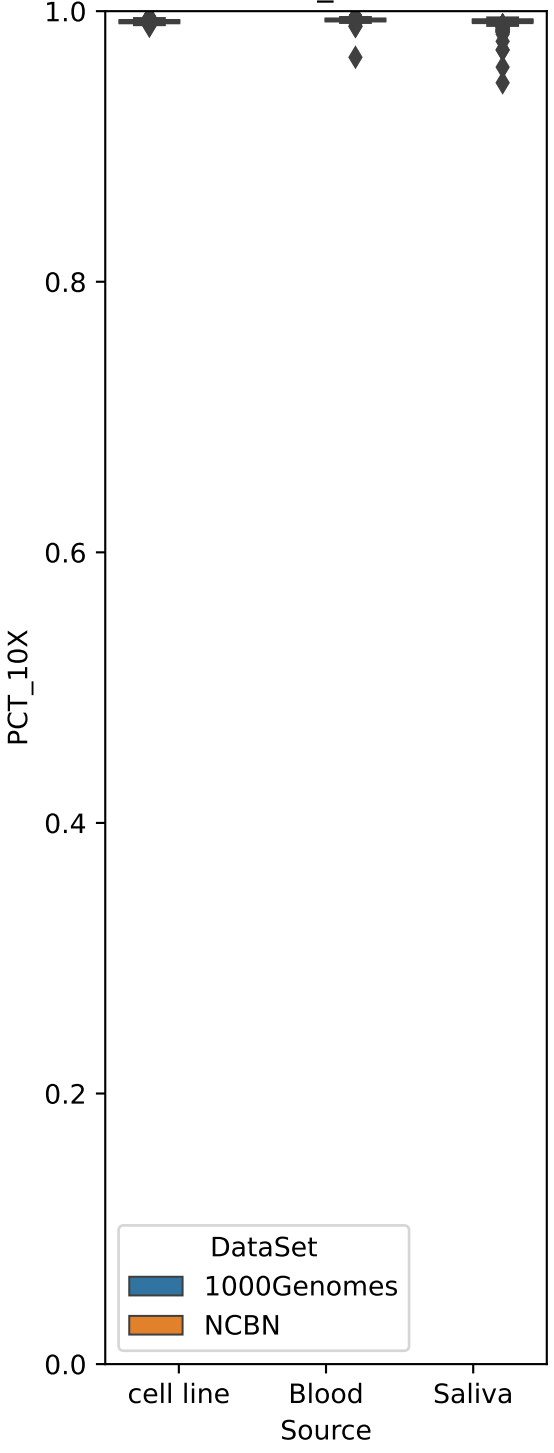

PCT\_20X

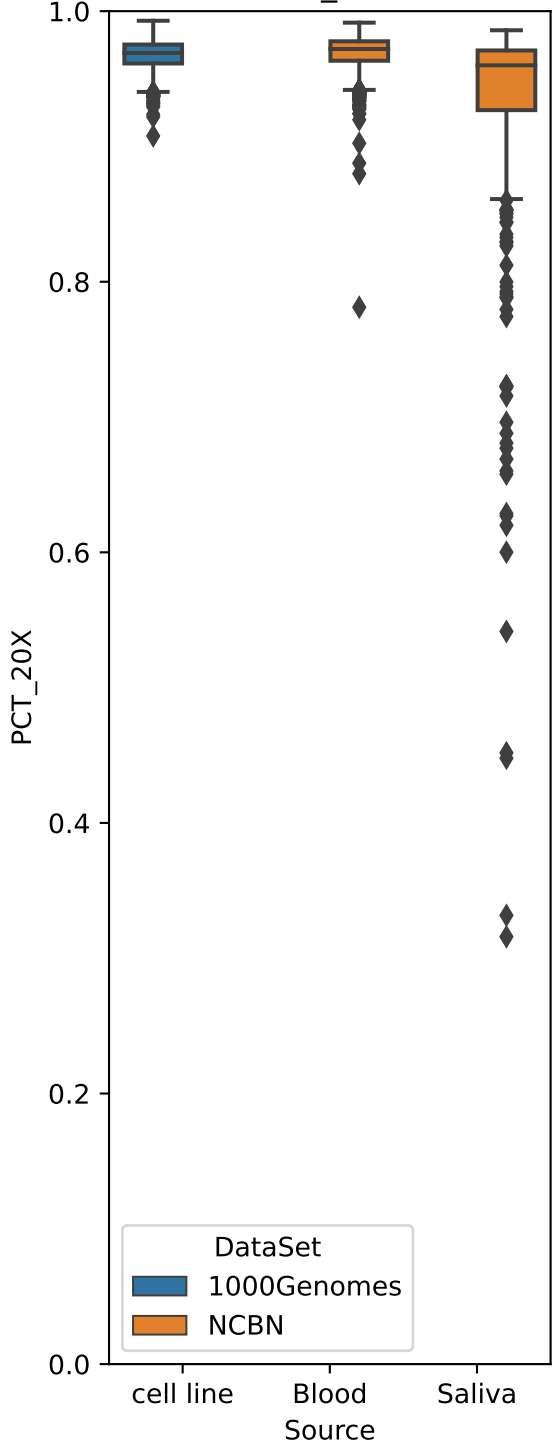

PCT\_30X

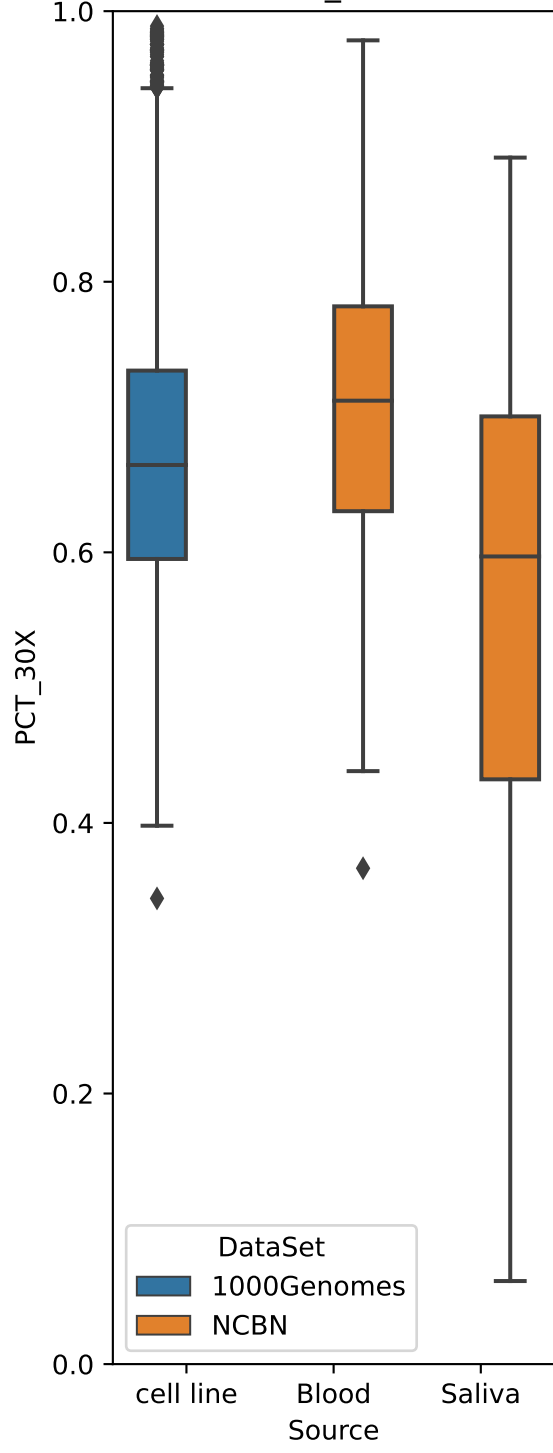

PCT\_40X

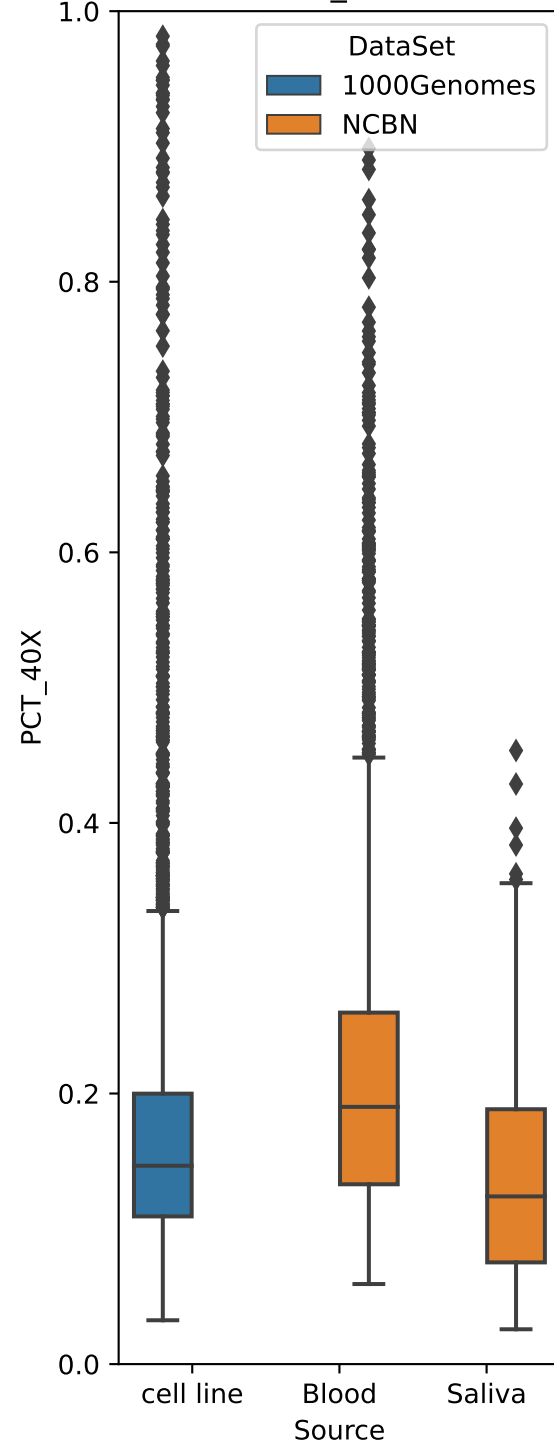

Source: https://storage.googleapis.com/plos-corpus-prod/10.1371/journal.pgen.1010625/1/pgen.1010625.s002.pdf
