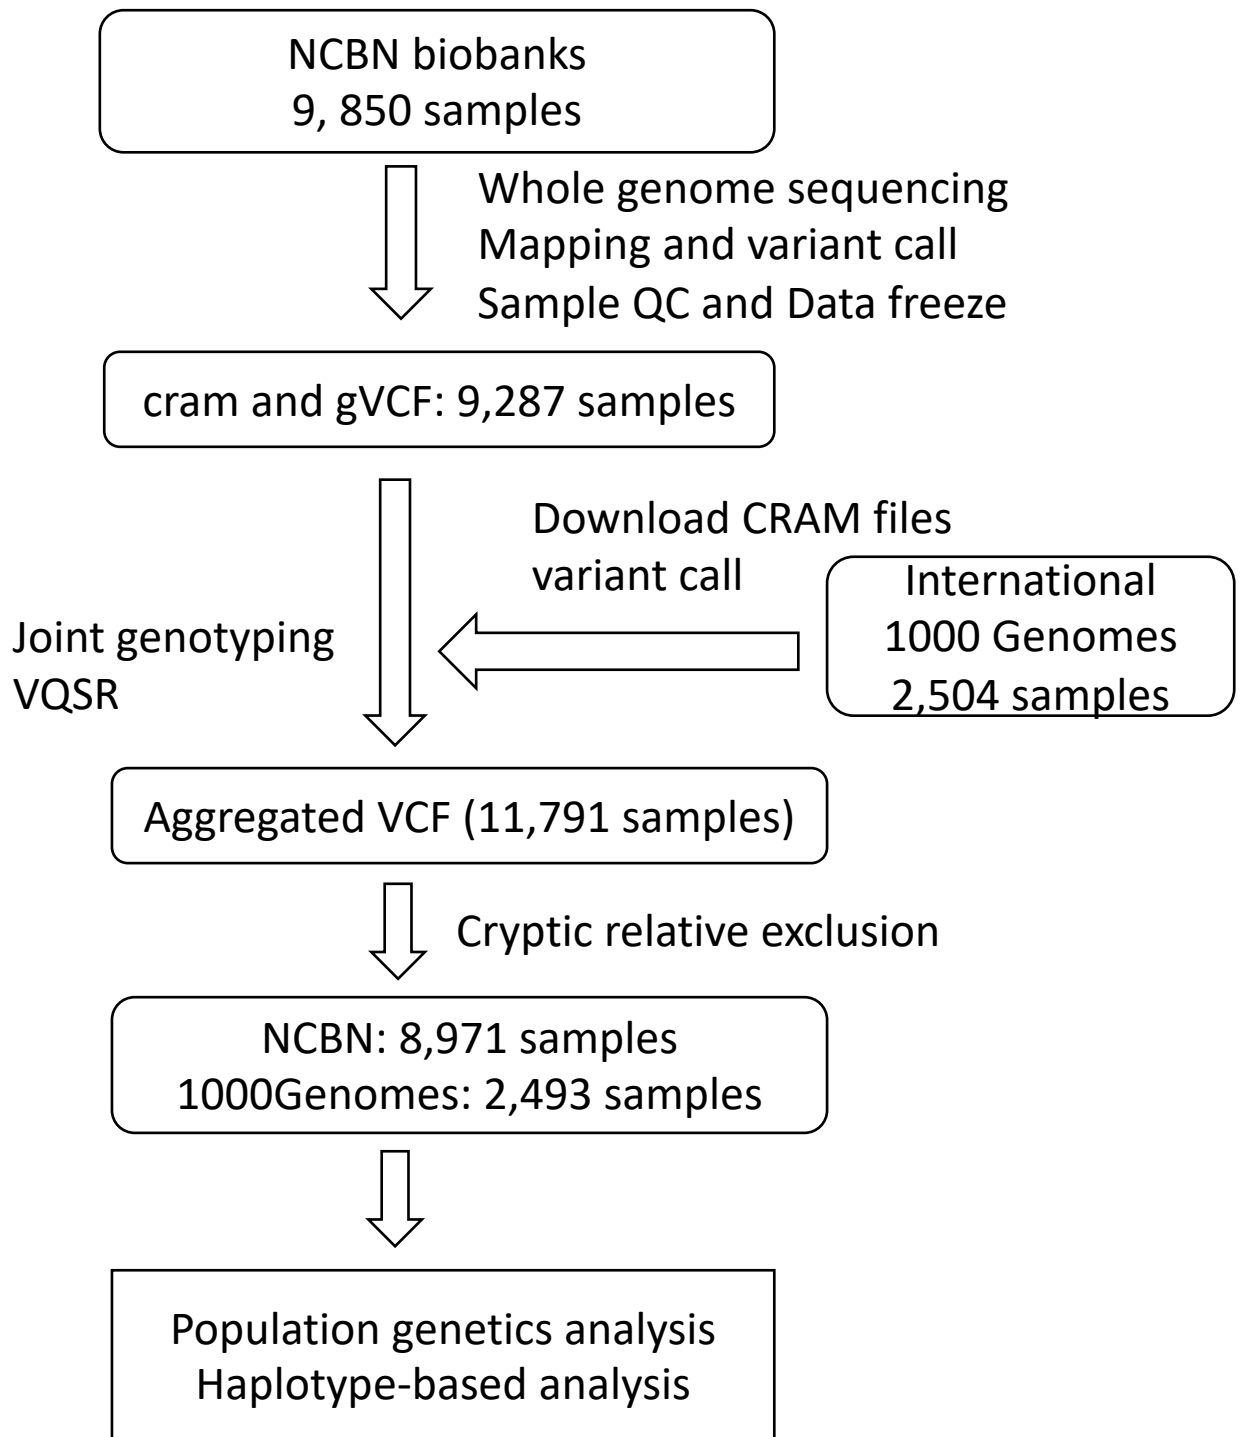

**S3 Fig: Breakdown of QC steps and sample size for this study**
