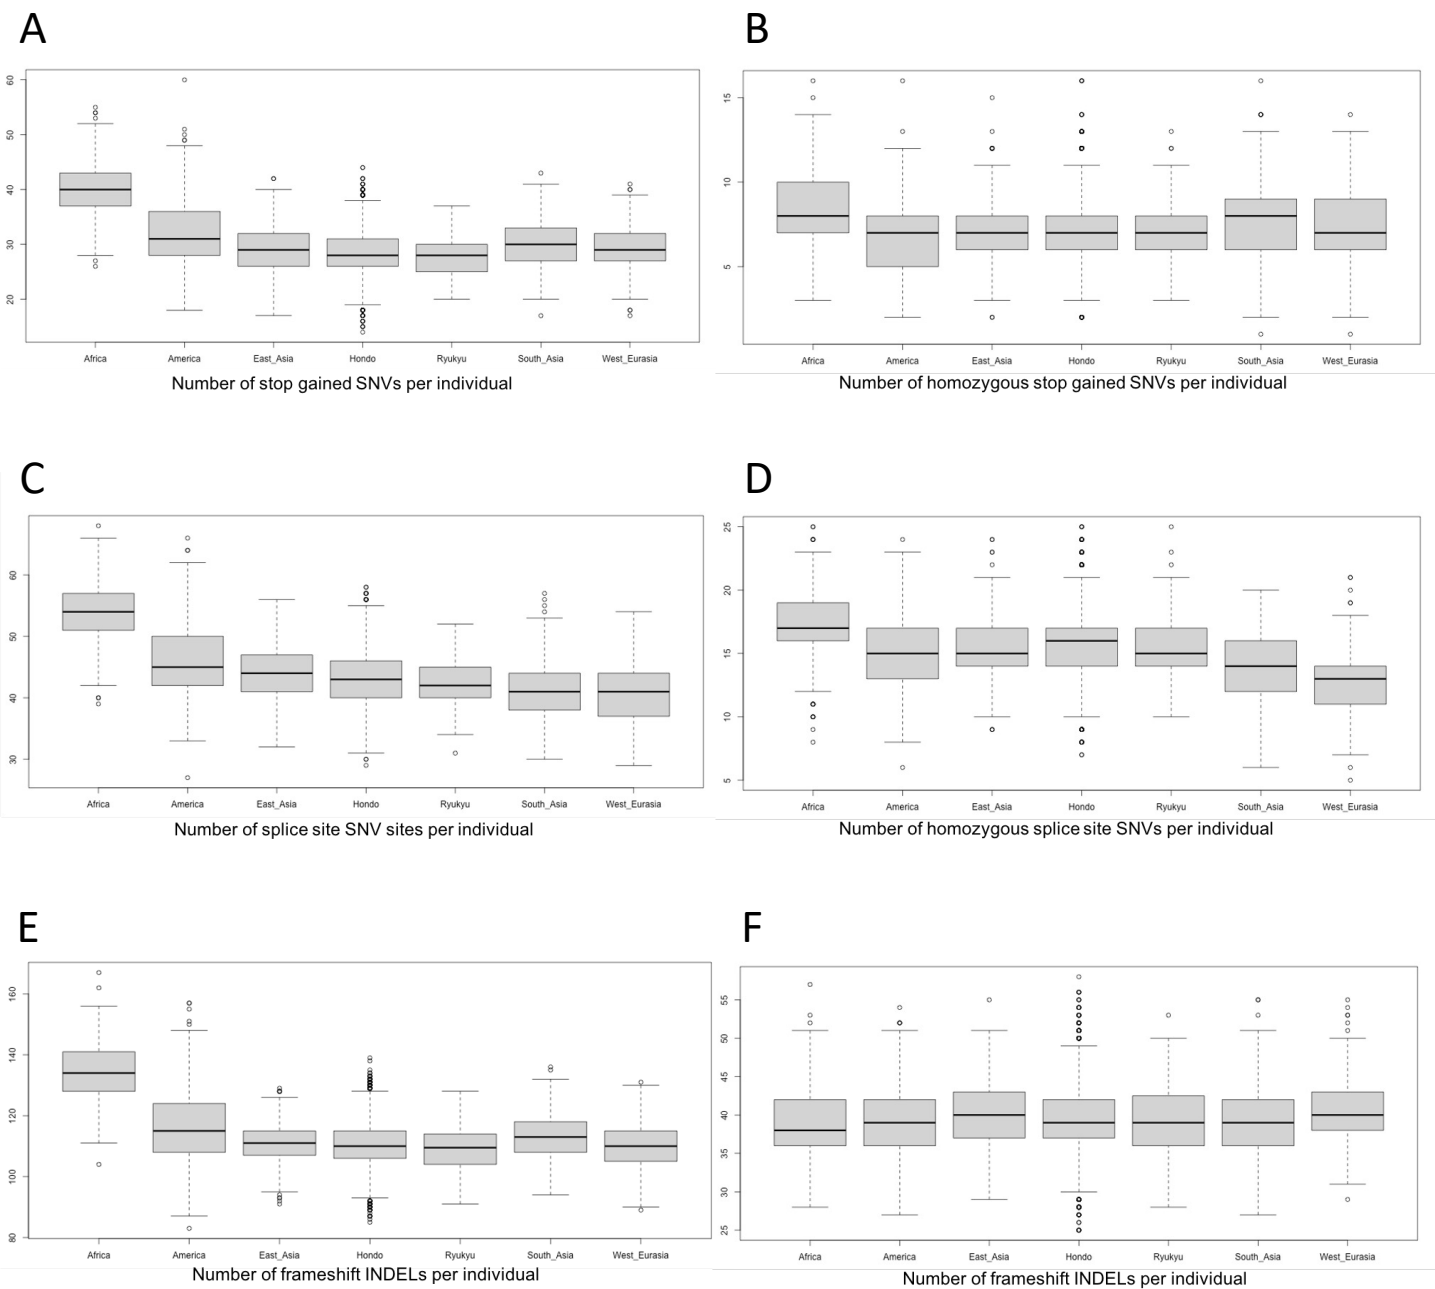

**S6 Fig: Analysis of Loss-of-function (LoF) variants.**
