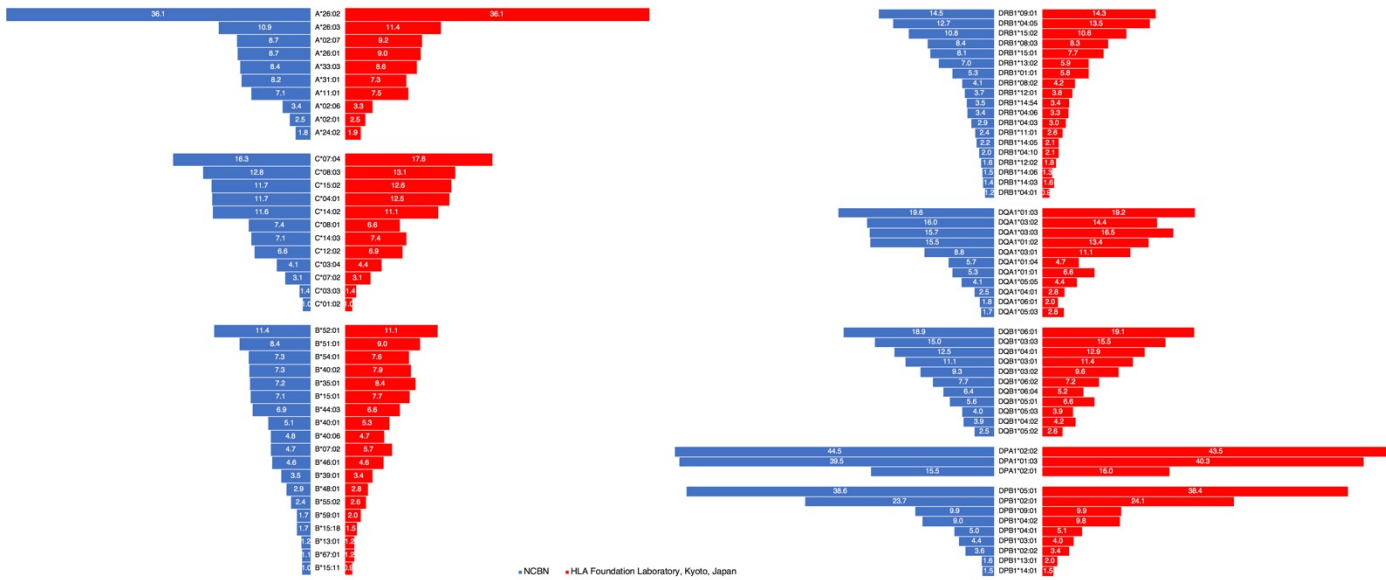

S7 Fig: HLA alleles frequencies (%) between NCBN vs HLA Foundation Laboratory, Kyoto, Japan.
