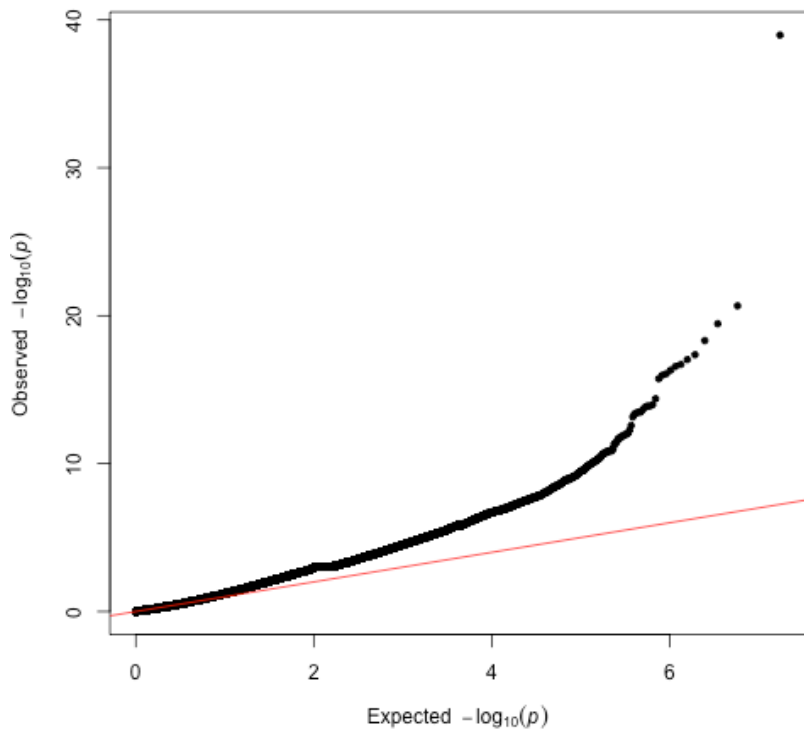

**S10 Fig: QQ plot of the selection scan result of the whole genome SNPs by Relate.**
