| rs ID    | Gene  | P value  | Effect size | Tissue                       |
|----------|-------|----------|-------------|------------------------------|
| rs174599 | FADS2 | 3.90E-41 | 0.6         | Whole Blood                  |
| rs174599 | FADS2 | 1.20E-24 | 0.44        | Esophagus - Muscularis       |
| rs174599 | FADS1 | 2.60E-24 | -0.36       | Esophagus - Mucosa           |
| rs174599 | FADS1 | 5.00E-24 | -0.71       | Brain - Cerebellum           |
| rs174599 | FADS1 | 1.50E-22 | -0.56       | Pancreas                     |
| rs174600 | FADS2 | 1.50E-43 | 0.65        | Whole Blood                  |
| rs174600 | FADS2 | 7.10E-25 | 0.29        | Cells - Cultured fibroblasts |
| rs174600 | FADS2 | 3.30E-24 | 0.47        | Esophagus - Muscularis       |
| rs174601 | FADS2 | 4.40E-41 | 0.6         | Whole Blood                  |
| rs174601 | FADS1 | 8.50E-25 | -0.36       | Esophagus - Mucosa           |
| rs174601 | FADS2 | 2.70E-24 | 0.44        | Esophagus - Muscularis       |
| rs174601 | FADS1 | 5.90E-23 | -0.7        | Brain - Cerebellum           |
| rs174601 | FADS1 | 1.70E-22 | -0.56       | Pancreas                     |
| rs97384  | FADS2 | 4.50E-42 | -0.62       | Whole Blood                  |
| rs97384  | FADS1 | 6.50E-25 | 0.62        | Pancreas                     |
| rs97384  | FADS1 | 4.80E-22 | 0.68        | Brain - Cerebellum           |
| rs97384  | FADS1 | 2.40E-21 | 0.35        | Esophagus - Mucosa           |
| rs97384  | FADS2 | 3.10E-21 | -0.42       | Esophagus - Muscularis       |

S3 Table. Abbreviated GTEx eQTL Results of SNPs affected by positive natural selection in FADS gene family, P Value Cut Off of  $10^{-20}$
